# Supplementary material
Source: publisher site journal article supplement (https://www.dovepress.com/get_supplementary_file.php?f=469859.docx)
Supplement: Supplementary file 1 [file get_supplementary_file.php]

**Supplementary table 1** The proportion and correlation of each index groups in the MAFLD group and the non-MAFLD group

| **Index** | **Groups** | **Value range** | **Non-MAFLD Group** | | | **MAFLD Group** | | | **Cramer's V** | **P-value** |
| --- | --- | --- | --- | --- | --- | --- | --- | --- | --- | --- |
| **N** | **Percentage in the index group** | **Percentage of total** | **N** | **Percentage in the index group** | **Percentage of total** |
| LAP | L1 | ＜13.64 | 1306 | 47.1% | 24.2% | 42 | 3.1% | 0.8% | 0.675 | ＜0.001*** |
|  | L2 | 13.64-29.97 | 933 | 33.7% | 17.3% | 419 | 31.0% | 7.8% |
|  | L3 | 29.97-56.10 | 387 | 14.0% | 7.2% | 963 | 71.3% | 17.8% |
|  | L4 | ＞56.10 | 145 | 5.2% | 2.7% | 1208 | 89.3% | 22.4% |
| VAI | V1 | ＜0.98 | 1205 | 43.5% | 22.3% | 145 | 10.7% | 2.7% | 0.563 | ＜0.001*** |
|  | V2 | 0.98-1.60 | 873 | 31.5% | 16.2% | 478 | 35.4% | 8.8% |
|  | V3 | 1.60-2.65 | 492 | 17.8% | 9.1% | 859 | 63.6% | 15.9% |
|  | V4 | ＞2.65 | 201 | 7.3% | 3.7% | 1150 | 85.1% | 21.3% |
| CMI | C1 | ＜0.30 | 1282 | 46.3% | 23.7% | 63 | 4.7% | 1.2% | 0.638 | ＜0.001*** |
|  | C2 | 0.30-0.56 | 903 | 32.6% | 16.7% | 453 | 33.4% | 8.4% |
|  | C3 | 0.56-1.01 | 409 | 14.8% | 7.6% | 940 | 69.7% | 17.4% |
|  | C4 | ＞1.01 | 177 | 6.4% | 3.3% | 1176 | 86.9% | 21.8% |
| TyG | T1 | ＜8.24 | 1234 | 44.5% | 22.8% | 112 | 8.3% | 2.1% | 0.589 | ＜0.001*** |
|  | T2 | 8.24-8.70 | 882 | 31.8% | 16.3% | 473 | 34.9% | 8.8% |
|  | T3 | 8.70-9.21 | 456 | 16.5% | 8.4% | 894 | 66.2% | 16.5% |
|  | T4 | ＞9.21 | 199 | 7.2% | 3.7% | 1153 | 85.3% | 21.3% |
| BAI | B1 | ＜25.63 | 901 | 32.5% | 16.7% | 446 | 33.1% | 8.3% | 0.201 | ＜0.001*** |
|  | B2 | 25.63-27.82 | 696 | 25.1% | 12.9% | 649 | 48.3% | 12.0% |
|  | B3 | 27.82-30.34 | 641 | 23.1% | 11.9% | 712 | 52.6% | 13.2% |
|  | B4 | ＞30.34 | 533 | 19.2% | 9.9% | 825 | 60.8% | 15.3% |
| HSI | H1 | ＜30.05 | 1297 | 46.8% | 24.0% | 52 | 3.9% | 1.0% | 0.652 | ＜0.001*** |
|  | H2 | 30.05-34.23 | 902 | 32.6% | 16.7% | 450 | 33.3% | 8.3% |
|  | H3 | 34.23-38.37 | 416 | 15.0% | 7.7% | 933 | 69.2% | 17.3% |
|  | H4 | ＞38.37 | 156 | 5.6% | 2.9% | 1197 | 88.5% | 22.2% |
| FLI | F1 | ＜8.28 | 1332 | 48.1% | 24.7% | 18 | 1.3% | 0.3% | 0.702 | ＜0.001*** |
|  | F2 | 8.28-30.66 | 942 | 34.0% | 17.4% | 409 | 30.3% | 7.6% |
|  | F3 | 30.66-61.99 | 373 | 13.5% | 6.9% | 978 | 72.4% | 18.1% |
|  | F4 | ＞61.99 | 124 | 4.5% | 2.3% | 1227 | 90.8% | 22.7% |
| BMI | BMI1 | ＜22.10 | 1243 | 44.9% | 23.0% | 62 | 4.8% | 1.1% | 0.623 | ＜0.001*** |
|  | BMI2 | 22.10-24.80 | 896 | 32.3% | 16.6% | 471 | 34.5% | 8.7% |
|  | BMI3 | 24.80-27.30 | 457 | 16.5% | 8.5% | 921 | 66.8% | 17.0% |
|  | BMI4 | ＞27.30 | 175 | 6.3% | 3.2% | 1178 | 87.1% | 21.8% |
| WC | W1 | ＜75.00 | 1203 | 43.4% | 22.3% | 42 | 3.4% | 0.8% | 0.641 | ＜0.001*** |
|  | W2 | 75.00-84.00 | 919 | 33.2% | 17.0% | 414 | 31.1% | 7.7% |
|  | W3 | 84.00-91.00 | 457 | 16.5% | 8.5% | 901 | 66.3% | 16.7% |
|  | W4 | ＞91.00 | 192 | 6.9% | 3.6% | 1275 | 86.9% | 23.6% |
| WHtR | WHtR1 | ＜0.47 | 1277 | 46.1% | 23.6% | 52 | 3.9% | 1.0% | 0.622 | ＜0.001*** |
|  | WHtR2 | 0.47-0.51 | 852 | 30.7% | 15.8% | 480 | 36.0% | 8.9% |
|  | WHtR3 | 0.51-0.55 | 443 | 16.0% | 8.2% | 943 | 68.0% | 17.5% |
|  | WHtR4 | ＞0.55 | 199 | 7.2% | 3.7% | 1157 | 85.3% | 21.4% |

**Notes:** ***P＜0.001. Lipid accumulation product (LAP), visceral fat index (VAI), cardiometabolic index (CMI), triglyceride-glucose (TyG) index, body adiposity index (BAI), hepatic steatosis index (HSI), fatty liver index (FLI), body mass index (BMI), waist circumference (WC).

**Supplementary table 2** Logistic regression analysis of MAFLD risk for each index in model 1

| **Groups** | **OR (95%CI)** | **P-value** | **Specificity** | **Sensitivity** | **Consistency**  **rate** | **PPV** | **NPV** |
| --- | --- | --- | --- | --- | --- | --- | --- |
| LAP(1) |  |  | 80.8% | 82.5% | 81.6% | 83.2% | 82.9% |
| LAP(2) | 13.97 (10.06-19.39) | ＜0.001*** |
| LAP(3) | 77.38 (55.68-107.53) | ＜0.001*** |
| LAP(4) | 259.06 (182.14-368.44) | ＜0.001*** |
| VAI(1) |  |  | 75.0% | 76.3% | 75.6% | 74.4% | 76.9% |
| VAI(2) | 4.55 (3.71-5.59) | ＜0.001*** |
| VAI(3) | 14.51 (11.82-17.81) | ＜0.001*** |
| VAI(4) | 47.55 (37.84-59.74) | ＜0.001*** |
| CMI(1) |  |  | 78.9% | 80.4% | 79.6% | 78.3% | 89.0% |
| CMI(2) | 10.21 (7.74-13.47) | ＜0.001*** |
| CMI(3) | 46.77 (35.41-61.78) | ＜0.001*** |
| CMI(4) | 135.20 (100.34-182.18) | ＜0.001*** |
| TyG(1) |  |  | 76.4% | 77.8% | 77.0% | 75.8% | 78.3% |
| TyG(2) | 5.91 (4.73-7.39) | ＜0.001*** |
| TyG(3) | 21.60 (17.27-27.02) | ＜0.001*** |
| TyG(4) | 63.84 (49.96-81.56) | ＜0.001*** |
| BAI(1) |  |  | 57.6% | 58.4% | 58.0% | 56.7% | 59.3% |
| BAI(2) | 1.88 (1.61-2.20) | ＜0.001*** |
| BAI(3) | 2.24 (1.92-2.62) | ＜0.001*** |
| BAI(4) | 3.13 (2.67-3.66) | ＜0.001*** |
| HSI(1) |  |  | 79.4% | 80.9% | 80.1% | 78.8% | 81.4% |
| HSI(2) | 12.44 (9.22-16.79) | ＜0.001*** |
| HSI(3) | 55.94 (41.43-75.54) | ＜0.001*** |
| HSI(4) | 191.38 (138.48-264.49) | ＜0.001*** |
| FLI(1) |  |  | 82.1% | 83.8% | 82.9% | 81.7% | 84.2% |
| FLI(2) | 32.13 (19.89-51.89) | ＜0.001*** |
| FLI(3) | 194.03 (120.05-313.60) | ＜0.001*** |
| FLI(4) | 732.24 (443.95-1207.76) | ＜0.001*** |
| BMI(1) |  |  | 77.2% | 79.7% | 78.4% | 76.9% | 85.2% |
| BMI(2) | 10.54 (7.98-13.92) | ＜0.001*** |
| BMI(3) | 40.40 (30.58-53.39) | ＜0.001*** |
| BMI(4) | 134.95 (99.93-182.25) | ＜0.001*** |
| WC(1) |  |  | 76.6% | 82.7% | 79.5% | 77.3% | 82.3% |
| WC(2) | 12.90 (9.29-17.93) | ＜0.001*** |
| WC(3) | 56.47 (40.70-78.36) | ＜0.001*** |
| WC(4) | 190.21 (134.97-268.04) | ＜0.001*** |
| WHtR(1) |  |  | 76.8% | 79.8% | 78.3% | 76.6% | 87.5% |
| WHtR(2) | 13.84 (10.26-18.66) | ＜0.001*** |
| WHtR(3) | 52.28 (38.75-70.52) | ＜0.001*** |
| WHtR(4) | 142.78 (104.15-195.73) | ＜0.001*** |

**Note:** ***P＜0.001. Without adjust and correct any indicators, the first group of each body fat index is used as a reference to measure the OR value of the MAFLD risk of each index at different levels. Lipid accumulation product (LAP), visceral fat index (VAI), cardiometabolic index (CMI), triglyceride-glucose (TyG) index, body adiposity index (BAI), hepatic steatosis index (HSI), fatty liver index (FLI), body mass index (BMI), waist circumference (WC).

**Supplementary table 3** Logistic regression analysis of MAFLD risk for each index in model 2

| **Groups** | **OR (95%CI)** | **P-value** | **Specificity** | **Sensitivity** | **Consistency**  **rate** | **PPV** | **NPV** |
| --- | --- | --- | --- | --- | --- | --- | --- |
| LAP(1) |  |  | 80.5% | 82.8% | 81.6% | 80.1% | 83.1% |
| LAP(2) | 10.32 (7.40-14.40) | ＜0.001*** |
| LAP(3) | 50.35 (35.99-70.44) | ＜0.001*** |
| LAP(4) | 159.46 (111.23-228.60) | ＜0.001*** |
| VAI(1) |  |  | 76.6% | 79.1% | 77.8% | 76.2% | 79.4% |
| VAI(2) | 3.90 (3.14-4.85) | ＜0.001*** |
| VAI(3) | 11.76 (9.46-14.62) | ＜0.001*** |
| VAI(4) | 36.17 (28.43-46.02) | ＜0.001*** |
| CMI(1) |  |  | 77.3% | 81.4% | 79.3% | 77.3% | 81.4% |
| CMI(2) | 7.56 (5.69-10.02) | ＜0.001*** |
| CMI(3) | 30.82 (23.14-41.04) | ＜0.001*** |
| CMI(4) | 84.82 (62.22-115.63) | ＜0.001*** |
| TyG(1) |  |  | 75.9% | 79.2% | 77.5% | 75.7% | 79.3% |
| TyG(2) | 4.29 (3.41-5.41) | ＜0.001*** |
| TyG(3) | 13.47 (10.68-16.99) | ＜0.001*** |
| TyG(4) | 35.32 (27.37-45.58) | ＜0.001*** |
| BAI(1) |  |  | 72.8% | 72.6% | 72.7% | 71.7% | 73.6% |
| BAI(2) | 2.61 (2.18-3.12) | ＜0.001*** |
| BAI(3) | 3.91 (3.24-4.72) | ＜0.001*** |
| BAI(4) | 10.04 (8.11-12.42) | ＜0.001*** |
| HSI(1) |  |  | 79.1% | 85.0% | 82.0% | 79.5% | 84.7% |
| HSI(2) | 8.57 (6.29-11.68) | ＜0.001*** |
| HSI(3) | 37.17 (27.26-50.69) | ＜0.001*** |
| HSI(4) | 153.21 (109.39-214.60) | ＜0.001*** |
| FLI(1) |  |  | 82.0% | 83.9% | 82.9% | 81.5% | 84.2% |
| FLI(2) | 27.76 (17.07-45.13) | ＜0.001*** |
| FLI(3) | 171.47 (104.58-281.12) | ＜0.001*** |
| FLI(4) | 703.97 (418.22-1184.97) | ＜0.001*** |
| BMI(1) |  |  | 76.8% | 82.1% | 79.4% | 77.1% | 81.9% |
| BMI(2) | 6.75 (5.07-8.99) | ＜0.001*** |
| BMI(3) | 23.44 (17.60-31.21) | ＜0.001*** |
| BMI(4) | 81.83 (60.18-111.27) | ＜0.001*** |
| WC(1) |  |  | 76.5% | 82.7% | 79.5% | 77.0% | 82.3% |
| WC(2) | 10.92 (7.81-15.27) | ＜0.001*** |
| WC(3) | 44.28 (31.31-62.63) | ＜0.001*** |
| WC(4) | 146.35 (101.40-211.21) | ＜0.001*** |
| WHtR(1) |  |  | 77.6% | 79.1% | 78.4% | 77.1% | 79.7% |
| WHtR(2) | 10.58 (7.80-14.35) | ＜0.001*** |
| WHtR(3) | 34.88 (25.62-47.48) | ＜0.001*** |
| WHtR(4) | 94.13 (67.83-130.62) | ＜0.001*** |

**Note:** ***P＜0.001. Corrected for gender (female assignment: 0, male assignment: 1), age, drinking, smoking factors. Lipid accumulation product (LAP), visceral fat index (VAI), cardiometabolic index (CMI), triglyceride-glucose (TyG) index, body adiposity index (BAI), hepatic steatosis index (HSI), fatty liver index (FLI), body mass index (BMI), waist circumference (WC).

**Supplementary table 4** ROC curve analysis of body fat indexes predicting the risk of MAFLD under different genders

| **Variable** | **Index** | **AUC (95% CI)** | **P** | **Cut-off value** | **Sensitivity** | **Specificity** | **Youden index** | **z** |
| --- | --- | --- | --- | --- | --- | --- | --- | --- |
| Female | LAP | 0.914 (0.903-0.926） | ＜0.001*** | 22.455 | 0.895 | 0.807 | 0.702 | 7.411*** |
| VAI | 0.863 (0.847-0.879） | ＜0.001*** | 1.586 | 0.781 | 0.795 | 0.576 | 6.444*** |
| CMI | 0.886 (0.872-0.900） | ＜0.001*** | 0.448 | 0.789 | 0.819 | 0.608 | 7.427*** |
| TyG | 0.856 (0.840-0.873） | ＜0.001*** | 8.451 | 0.837 | 0.723 | 0.560 | 5.883*** |
| BAI | 0.782 (0.762-0.802） | ＜0.001*** | 30.684 | 0.658 | 0.766 | 0.424 | 5.158*** |
| HSI | 0.905 (0.893-0.917） | ＜0.001*** | 32.296 | 0.921 | 0.747 | 0.668 | 7.394*** |
| FLI | 0.933 (0.924-0.943） | ＜0.001*** | 13.317 | 0.938 | 0.804 | 0.742 | 7.930*** |
| BMI | 0.881 (0.867-0.895） | ＜0.001*** | 23.850 | 0.830 | 0.783 | 0.613 | 6.084*** |
| WC | 0.889 (0.876-0.902） | ＜0.001*** | 78.300 | 0.843 | 0.786 | 0.629 | 6.821*** |
| WHtR | 0.892 (0.879-0.905） | ＜0.001*** | 0.495 | 0.860 | 0.767 | 0.627 | 7.714*** |
| Male | LAP | 0.842 (0.827-0.857） | ＜0.001*** | 34.648 | 0.789 | 0.754 | 0.543 |  |
| VAI | 0.786 (0.769-0.803） | ＜0.001*** | 1.516 | 0.789 | 0.650 | 0.439 |  |
| CMI | 0.803 (0.786-0.820） | ＜0.001*** | 0.637 | 0.793 | 0.679 | 0.472 |  |
| TyG | 0.784 (0.767-0.802） | ＜0.001*** | 8.804 | 0.765 | 0.690 | 0.455 |  |
| BAI | 0.708 (0.689-0.728） | ＜0.001*** | 26.289 | 0.690 | 0.626 | 0.316 |  |
| HSI | 0.831 (0.816-0.847） | ＜0.001*** | 34.149 | 0.829 | 0.684 | 0.513 |  |
| FLI | 0.865 (0.851-0.879） | ＜0.001*** | 39.818 | 0.831 | 0.752 | 0.583 |  |
| BMI | 0.815 (0.799-0.831） | ＜0.001*** | 25.150 | 0.780 | 0.709 | 0.489 |  |
| WC | 0.817 (0.801-0.833） | ＜0.001*** | 86.050 | 0.793 | 0.689 | 0.482 |  |
| WHtR | 0.809 (0.793-0.826） | ＜0.001*** | 0.504 | 0.852 | 0.619 | 0.471 |  |

**Notes:** ***P＜0.001. The AUC values of lipid accumulation product (LAP), visceral fat index (VAI), cardiometabolic index (CMI), triglyceride-glucose (TyG) index, body adiposity index (BAI), hepatic steatosis index (HSI), fatty liver index (FLI), body mass index (BMI), waist circumference (WC) were higher in female than in male, and the difference was statistically significant.

**Supplementary table 5** ROC curve analysis of body fat indexes predicting the risk of MAFLD at different BMI levels

| **Variable** | **Index** | **AUC (95% CI)** | **P** | **Cut-off value** | **Sensitivity** | **Specificity** | **Youden index** | **z** |
| --- | --- | --- | --- | --- | --- | --- | --- | --- |
| BMI<24 | LAP | 0.900 (0.883-0.916） | ＜0.001*** | 22.230 | 0.823 | 0.858 | 0.681 | 9.120*** |
| VAI | 0.849 (0.826-0.871） | ＜0.001*** | 1.413 | 0.776 | 0.775 | 0.551 | 7.328*** |
| CMI | 0.882 (0.864-0.900） | ＜0.001*** | 0.426 | 0.823 | 0.780 | 0.603 | 9.057*** |
| TyG | 0.877 (0.857-0.897） | ＜0.001*** | 8.530 | 0.851 | 0.758 | 0.609 | 9.176*** |
| BAI | 0.481 (0.448-0.515） | 0.272 | 22.548 | 0.947 | 0.094 | 0.041 | -0.841 |
| HSI | 0.836 (0.814-0.859） | ＜0.001*** | 30.726 | 0.801 | 0.748 | 0.549 | 4.957*** |
| FLI | 0.914 (0.901-0.928） | ＜0.001*** | 13.282 | 0.888 | 0.812 | 0.700 | 9.120*** |
| BMI | 0.795 (0.772-0.817） | ＜0.001*** | 21.950 | 0.826 | 0.640 | 0.466 | 4.967*** |
| WC | 0.845 (0.825-0.865） | ＜0.001*** | 76.150 | 0.835 | 0.702 | 0.537 | 7.009*** |
| WHtR | 0.835 (0.815-0.855） | ＜0.001*** | 0.477 | 0.811 | 0.748 | 0.559 | 7.746*** |
| BMI≥24 | LAP | 0.784 (0.766-0.802） | ＜0.001*** | 35.145 | 0.785 | 0.659 | 0.444 |  |
| VAI | 0.737 (0.717-0.756） | ＜0.001*** | 1.555 | 0.790 | 0.561 | 0.351 |  |
| CMI | 0.761 (0.741-0.780） | ＜0.001*** | 0.620 | 0.776 | 0.626 | 0.402 |  |
| TyG | 0.748 (0.729-0.768） | ＜0.001*** | 8.832 | 0.717 | 0.672 | 0.389 |  |
| BAI | 0.499 (0.476-0.522） | 0.909 | 25.313 | 0.897 | 0.148 | 0.045 |  |
| HSI | 0.762 (0.744-0.781） | ＜0.001*** | 36.724 | 0.668 | 0.723 | 0.391 |  |
| FLI | 0.813 (0.796-0.830） | ＜0.001*** | 42.154 | 0.772 | 0.704 | 0.476 |  |
| BMI | 0.719 (0.700-0.739） | ＜0.001*** | 26.850 | 0.574 | 0.752 | 0.326 |  |
| WC | 0.746 (0.728-0.765） | ＜0.001*** | 88.350 | 0.667 | 0.692 | 0.359 |  |
| WHtR | 0.724 (0.705-0.744） | ＜0.001*** | 0.520 | 0.783 | 0.535 | 0.318 |  |

**Notes:** ***P＜0.001. The AUC values of lipid accumulation product (LAP), visceral fat index (VAI), cardiometabolic index (CMI), triglyceride-glucose (TyG) index, body adiposity index (BAI), hepatic steatosis index (HSI), fatty liver index (FLI), body mass index (BMI), waist circumference (WC) were higher in BMI<24 group than in BMI≥24 group, and the difference was statistically significant.

**Supplementary table 6** ROC curve analysis of body fat indexes predicting the risk of MAFLD at different age levels

| **Variable** | **Index** | **AUC (95% CI)** | **P** | **Cut-off value** | **Sensitivity** | **Specificity** | **Youden index** | **z** |
| --- | --- | --- | --- | --- | --- | --- | --- | --- |
| ＜35  years old | LAP | 0.936 (0.926-0.945） | ＜0.001*** | 22.590 | 0.921 | 0.815 | 0.736 | 9.824*** |
| VAI | 0.874 (0.859-0.89） | ＜0.001*** | 1.646 | 0.782 | 0.823 | 0.605 | 7.422*** |
| CMI | 0.913 (0.901-0.925） | ＜0.001*** | 0.476 | 0.894 | 0.793 | 0.687 | 8.909*** |
| TyG | 0.884 (0.869-0.899） | ＜0.001*** | 8.578 | 0.825 | 0.793 | 0.618 | 7.404*** |
| BAI | 0.661 (0.637-0.685） | ＜0.001*** | 26.740 | 0.688 | 0.553 | 0.241 | 5.794*** |
| HSI | 0.938 (0.929-0.948） | ＜0.001*** | 34.219 | 0.904 | 0.841 | 0.745 | 11.650*** |
| FLI | 0.951 (0.943-0.959） | ＜0.001*** | 20.653 | 0.955 | 0.817 | 0.772 | 10.144*** |
| BMI | 0.921 (0.91-0.932） | ＜0.001*** | 24.250 | 0.905 | 0.791 | 0.696 | 10.708*** |
| WC | 0.924 (0.913-0.935） | ＜0.001*** | 80.050 | 0.927 | 0.769 | 0.696 | 10.407*** |
| WHtR | 0.912 (0.901-0.924） | ＜0.001*** | 0.496 | 0.857 | 0.817 | 0.674 | 10.382*** |
| ≥35  years old | LAP | 0.851 (0.838-0.865） | ＜0.001*** | 31.738 | 0.814 | 0.755 | 0.569 |  |
| VAI | 0.792 (0.776-0.808） | ＜0.001*** | 1.579 | 0.763 | 0.683 | 0.446 |  |
| CMI | 0.827 (0.813-0.842） | ＜0.001*** | 0.570 | 0.793 | 0.731 | 0.524 |  |
| TyG | 0.804 (0.789-0.820） | ＜0.001*** | 8.802 | 0.735 | 0.742 | 0.477 |  |
| BAI | 0.569 (0.549-0.589） | ＜0.001*** | 27.087 | 0.694 | 0.413 | 0.107 |  |
| HSI | 0.839 (0.825-0.852） | ＜0.001*** | 34.288 | 0.772 | 0.753 | 0.525 |  |
| FLI | 0.874 (0.861-0.886） | ＜0.001*** | 29.197 | 0.849 | 0.749 | 0.598 |  |
| BMI | 0.821 (0.807-0.836） | ＜0.001*** | 24.850 | 0.763 | 0.725 | 0.488 |  |
| WC | 0.829 (0.815-0.843） | ＜0.001*** | 84.700 | 0.784 | 0.718 | 0.502 |  |
| WHtR | 0.811 (0.796-0.826） | ＜0.001*** | 0.521 | 0.731 | 0.739 | 0.470 |  |

**Notes:** ***P＜0.001. The AUC values of lipid accumulation product (LAP), visceral fat index (VAI), cardiometabolic index (CMI), triglyceride-glucose (TyG) index, body adiposity index (BAI), hepatic steatosis index (HSI), fatty liver index (FLI), body mass index (BMI), waist circumference (WC) were higher in age＜35 group than in age≥35 group, and the difference was statistically significant.
